# Supplementary material for: Circulating HPV DNA as a Biomarker for Pre-Invasive and Early Invasive Cervical Cancer: A Feasibility Study
Source: MDPI journal article supplement (doi:10.3390/cancers15092590), 2023-05-02
Supplement: s1 [file s1]

Table S1. Cost calculation.

|                                                                                        | Cost | Reaction size |                               | Cost per sample |
|----------------------------------------------------------------------------------------|------|---------------|-------------------------------|-----------------|
| Sequencing costs including Proton Chip v2, 520 flows SE and Proton Hi-Q templating kit | 2800 | 50            |                               | 56              |
|                                                                                        |      |               |                               |                 |
| Ion AmpliSeq Library Kit 2.0                                                           | 5994 | 192           |                               | 31.22           |
|                                                                                        |      |               |                               |                 |
| Ion Xpress™ Barcode Adapters 1-96 Kit                                                  | 7103 | 3840          |                               | 1.85            |
| Ion Universal Library Quantitation Kit                                                 | 800  | 500           |                               | 3.20            |
| Ion Ampliseq Custom DNA Panel Primer Pools                                             | 3551 | 3000          |                               | 1.18            |
| Beckman Coulter™ Agencourt AMPure XP                                                   | 646  | 600           |                               | 1.08            |
| Agilent Bioanalyzer High Sensitivity DNA Kit                                           | 344  | 110           |                               | 3.13            |
|                                                                                        |      |               |                               |                 |
| cfDNA RNase P Quantification by ddPCR                                                  |      |               |                               | 3               |
|                                                                                        |      |               |                               |                 |
|                                                                                        |      |               | Total reagent cost per sample | 131.87          |

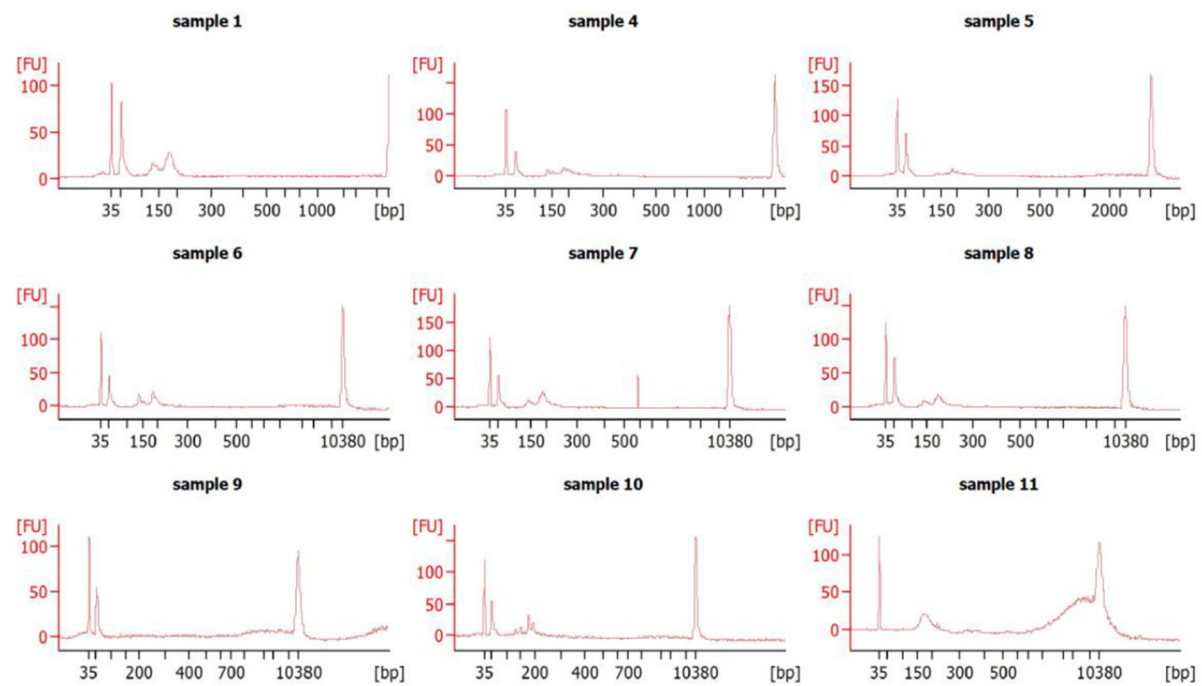

Figure S1. Bioanalyzer traces for 9 libraries

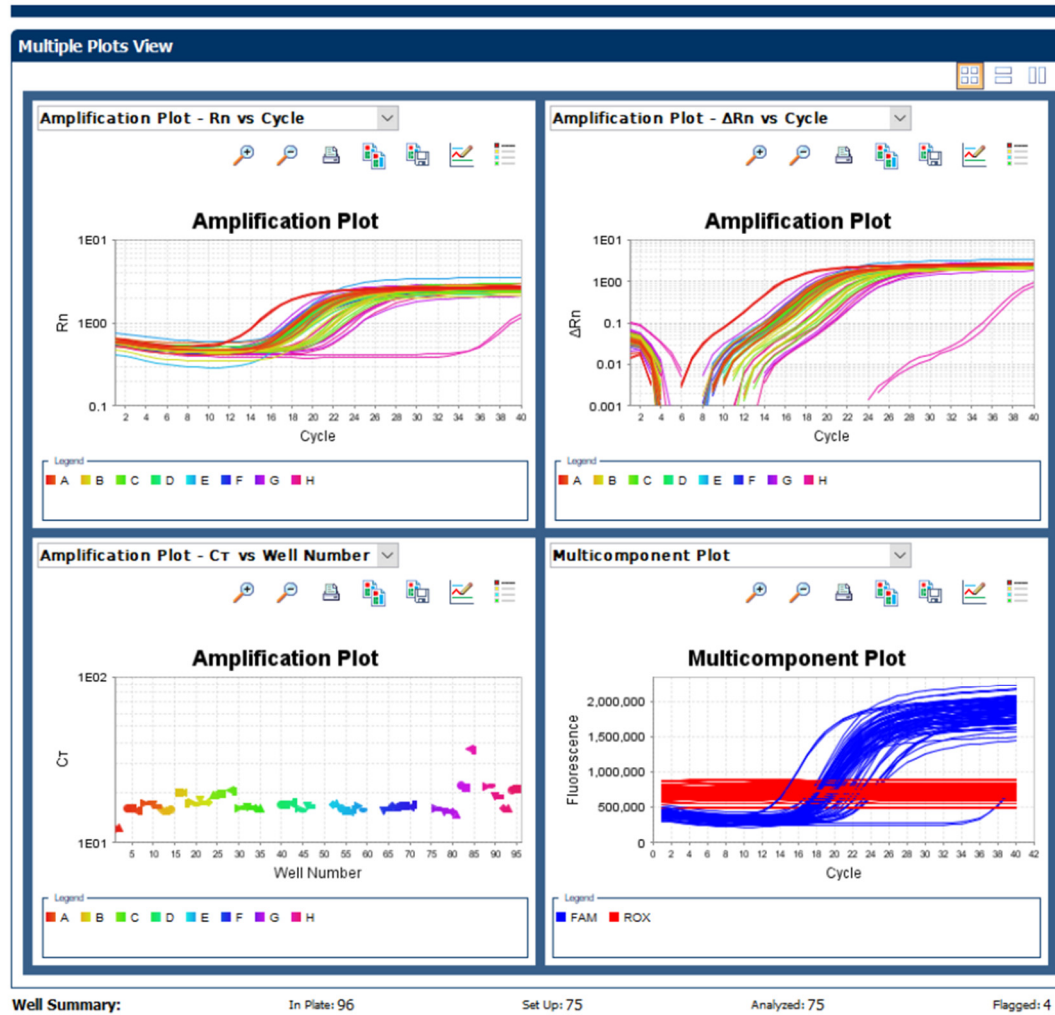

Figure S2. Amplification plots from qPCR of the libraries
